# Supplementary material
Source: ML conference proceedings conference paper supplement (https://openaccess.thecvf.com/content/cvpr_2015/html/Han_Unsupervised_Simultaneous_Orthogonal_2015_CVPR_paper.html)
Supplement: Supplementary file 1 [file Han_Unsupervised_Simultaneous_Orthogonal_2015_CVPR_supplemental.pdf]

# Unsupervised Simultaneous Orthogonal Basis Clustering Feature Selection - Supplementary Material

Dongyoon Han and Junmo Kim  
School of Electrical Engineering, KAIST, South Korea  
{dyhan, junmo.kim}@kaist.ac.kr

---

## Algorithm 1: E, F updates algorithm

---

**Input:**  $\mathbf{F}_t, \mathbf{W}_t$  and  $\mathbf{B}_t$ ; Parameter:  $\gamma$   
**Initialization:**  $s = 0$  and  $\mathbf{F}'_s = \mathbf{F}_t$   
**repeat**  
 2    Update  $\mathbf{E}'_{s+1} = \mathbf{V}_E \mathbf{I}_{n,c} \mathbf{U}_E^T$  by (4) where  
        $\mathbf{B}^T \mathbf{W}_t^T \mathbf{X}_t + \gamma \mathbf{F}'_s{}^T = \mathbf{U}_E \Sigma_E \mathbf{V}_E^T$ ;  
 3    Update  $\mathbf{F}'_{s+1} = \frac{\mathbf{E}'_{s+1} + |\mathbf{E}'_{s+1}|}{2}$  by (5);  
 4     $s = s + 1$ ;  
**until**  $\|\Delta J_{EF}^{(t)}(\mathbf{E}'_s, \mathbf{F}'_s)\| \leq \epsilon$  or  $s \leq S$ ;  
**Output:**  $\mathbf{E}_{t+1} = \mathbf{E}'_s, \mathbf{F}_{t+1} = \mathbf{F}'_s$

---

## 1. Preliminaries

### 1.1. The Reformulated Objective Function

$$\min_{\mathbf{W}, \mathbf{B}, \mathbf{E}, \mathbf{F}} \|\mathbf{W}^T \mathbf{X} - \mathbf{B} \mathbf{E}^T\|_F^2 + \lambda \|\mathbf{W}\|_{2,1} + \gamma \|\mathbf{F} - \mathbf{E}\|_F^2$$

$$s.t. \quad \mathbf{B}^T \mathbf{B} = \mathbf{I}, \mathbf{E}^T \mathbf{E} = \mathbf{I}, \mathbf{F} \geq \mathbf{0}. \quad (1)$$

### 1.2. Update Rules

**W update:**

$$\mathbf{W} = (\mathbf{X} \mathbf{X}^T + \lambda \mathbf{D})^{-1} \mathbf{X} \mathbf{E} \mathbf{B}^T. \quad (2)$$

**B update:**

$$\mathbf{B} = \mathbf{V}_B \mathbf{I}_{m,c} \mathbf{U}_B^T, \quad (3)$$

where  $\mathbf{U}_B$  and  $\mathbf{V}_B$  are the left and right eigenvectors of  $\mathbf{E}^T \mathbf{X}^T \mathbf{W}$  computed by SVD, respectively.

**E, F update:**

$$\mathbf{E} = \mathbf{V}_E \mathbf{I}_{n,c} \mathbf{U}_E^T, \quad (4)$$

where  $\mathbf{U}_E$  and  $\mathbf{V}_E$  are the left and right eigenvectors of  $\mathbf{B}^T \mathbf{W}^T \mathbf{X} + \gamma \mathbf{F}^T$  computed by SVD, respectively.

$$\mathbf{F} = \frac{1}{2}(\mathbf{E} + |\mathbf{E}|). \quad (5)$$

---

## Algorithm 2: SOCFS

---

**Input:** Data matrix  $\mathbf{X} \in \mathbb{R}^{d \times n}$ ; Parameters:  $\lambda, \gamma$   
**Initialization:**  $t = 0, \mathbf{D}_t = \mathbf{I}$  and  $\mathbf{B}_t, \mathbf{E}_t$   
**repeat**  
 2    Update  $\mathbf{E}_{t+1}$  and  $\mathbf{F}_{t+1}$  by Algorithm 1;  
 3    Update  $\mathbf{W}_{t+1} = (\mathbf{X} \mathbf{X}^T + \lambda \mathbf{D}_t)^{-1} \mathbf{X} \mathbf{E}_{t+1} \mathbf{B}_t^T$  by (2);  
 4    Update  $\mathbf{B}_{t+1} = \mathbf{V}_B \mathbf{I}_{m,c} \mathbf{U}_B^T$  by (3) where  
        $\mathbf{E}_{t+1}^T \mathbf{X}^T \mathbf{W}_{t+1} = \mathbf{U}_B \Sigma_B \mathbf{V}_B^T$ ;  
 5    Update the  $i$ -th diagonal elements of the diagonal matrix  $\mathbf{D}_{t+1}$  with  $\frac{1}{2\|\mathbf{w}_{t+1}^i\|_2}$ ;  
 6     $t = t + 1$ ;  
**until**  $\|\Delta J(\mathbf{W}_t, \mathbf{B}_t, \mathbf{E}_t, \mathbf{F}_t)\| \leq \epsilon$  or  $t \leq T$ ;  
**Output:** Features are selected corresponding to the largest values of  $\|\mathbf{w}_t^i\|, i = 1 \dots d$ , which are sorted by descending order.

---

### 1.3. Algorithms

The optimization algorithm containing the  $\mathbf{E}$  and  $\mathbf{F}$  update rules is summarized in Algorithm 1. The overall proposed optimization algorithm of SOCFS is also presented in Algorithm 2.

## 2. Convergence Analysis

We prove the convergence of the proposed optimization algorithm with monotonic decrease at every iteration. We denote the objective function in problem (1) as  $J(\mathbf{W}, \mathbf{B}, \mathbf{E}, \mathbf{F})$  for convenience.

**Theorem 1.**  $J_{EF}^{(t)}(\mathbf{E}'_s, \mathbf{F}'_s) \triangleq J(\mathbf{W}_t, \mathbf{B}_t, \mathbf{E}'_s, \mathbf{F}'_s)$  monotonically decreases due to E, F updates in Algorithm 1.

*Proof.* For the  $\mathbf{F}'$  update from by (5), we have

$$\mathbf{F}'_{s+1} = \arg \min_{\mathbf{F}': \mathbf{F}' \succeq \mathbf{0}} \|\mathbf{F}' - \mathbf{E}'_s\|_F^2 = \arg \min_{\mathbf{F}': \mathbf{F}' \succeq \mathbf{0}} J_{EF}^{(t)}(\mathbf{E}'_s, \mathbf{F}')$$

$$\implies J_{EF}^{(t)}(\mathbf{E}'_s, \mathbf{F}'_{s+1}) \leq J_{EF}^{(t)}(\mathbf{E}'_s, \mathbf{F}'_s). \quad (6)$$

Similarly, for the  $\mathbf{E}'$  update by (4), we have

$$\begin{aligned}\mathbf{E}'_{s+1} &= \arg \min_{\mathbf{E}': \mathbf{E}'^T \mathbf{E}' = \mathbf{I}} \|\mathbf{B}_t \mathbf{E}'^T - \mathbf{W}_t^T \mathbf{X}\|_F^2 + \gamma \|\mathbf{E}' - \mathbf{F}'_{s+1}\|_F^2 \\ &= \arg \min_{\mathbf{E}': \mathbf{E}'^T \mathbf{E}' = \mathbf{I}} J_{EF}^{(t)}(\mathbf{E}', \mathbf{F}'_{s+1}) \\ &\Rightarrow J_{EF}^{(t)}(\mathbf{E}'_{s+1}, \mathbf{F}'_{s+1}) \leq J_{EF}^{(t)}(\mathbf{E}'_s, \mathbf{F}'_{s+1}).\end{aligned}\quad (7)$$

By combining (6) and (7), we finally obtain

$$J_{EF}^{(t)}(\mathbf{E}'_{s+1}, \mathbf{F}'_{s+1}) \leq J_{EF}^{(t)}(\mathbf{E}'_{s+1}, \mathbf{F}'_s) \leq J_{EF}^{(t)}(\mathbf{E}'_s, \mathbf{F}'_s).$$

Thus  $J_{EF}^{(t)}(\mathbf{E}'_s, \mathbf{F}'_s)$  monotonically decreases by the update rules (4) and (5) in Algorithm 1. We also notice that, since  $J_{EF}^{(t)}(\mathbf{E}'_s, \mathbf{F}'_s)$  is convex in each variable, the algorithm must converge.  $\square$

**Theorem 2.**  $J(\mathbf{W}_t, \mathbf{B}_t, \mathbf{E}_t, \mathbf{F}_t)$  monotonically decreases due to the update rules in Algorithm 2.

*Proof.* For the  $\mathbf{E}$  and  $\mathbf{F}$  updates,  $\mathbf{E}_{t+1}$  and  $\mathbf{F}_{t+1}$  are updated at the same time by Algorithm 1, so that we have

$$J(\mathbf{W}_t, \mathbf{B}_t, \mathbf{E}_{t+1}, \mathbf{F}_{t+1}) \leq J(\mathbf{W}_t, \mathbf{B}_t, \mathbf{E}_t, \mathbf{F}_t). \quad (8)$$

For the  $\mathbf{W}$  update by (2), which follows the theorem in [1] closely,  $\mathbf{W}_{t+1}$  is also the solution of the following problem with fixed  $\mathbf{D}_t$  as

$$\mathbf{W}_{t+1} = \arg \min_{\mathbf{W}} \|\mathbf{W}_t^T \mathbf{X} - \mathbf{B}_t \mathbf{E}_t^T\|_F^2 + \lambda \text{tr}(\mathbf{W}_t^T \mathbf{D}_t \mathbf{W}_t).$$

This implies that

$$\begin{aligned}\|\mathbf{W}_{t+1}^T \mathbf{X} - \mathbf{B}_t \mathbf{E}_t^T\|_F^2 + \lambda \text{tr}(\mathbf{W}_{t+1}^T \mathbf{D}_t \mathbf{W}_{t+1}) \\ \leq \|\mathbf{W}_t^T \mathbf{X} - \mathbf{B}_t \mathbf{E}_t^T\|_F^2 + \lambda \text{tr}(\mathbf{W}_t^T \mathbf{D}_t \mathbf{W}_t).\end{aligned}\quad (9)$$

And then according to the lemma in [1] with  $\mathbf{u} = \mathbf{w}_{t+1}^i$ ,  $\mathbf{u}_t = \mathbf{w}_t^i$  and summation over all rows, we have

$$\sum_{i=1}^d \left( \|\mathbf{w}_{t+1}^i\|_2 - \frac{\|\mathbf{w}_{t+1}^i\|_2^2}{2\|\mathbf{w}_t^i\|_2} \right) \leq \sum_{i=1}^d \left( \|\mathbf{w}_t^i\|_2 - \frac{\|\mathbf{w}_t^i\|_2^2}{2\|\mathbf{w}_t^i\|_2} \right).$$

We rewrite the inequality as

$$\begin{aligned}\|\mathbf{W}_{t+1}\|_{2,1} - \text{tr}(\mathbf{W}_{t+1}^T \mathbf{D}_t \mathbf{W}_{t+1}) \\ \leq \|\mathbf{W}_t\|_{2,1} - \text{tr}(\mathbf{W}_t^T \mathbf{D}_t \mathbf{W}_t).\end{aligned}\quad (10)$$

By combining (9) and (10), we finally obtain

$$J(\mathbf{W}_{t+1}, \mathbf{B}_t, \mathbf{E}_{t+1}, \mathbf{F}_{t+1}) \leq J(\mathbf{W}_t, \mathbf{B}_t, \mathbf{E}_{t+1}, \mathbf{F}_{t+1}). \quad (11)$$

For the  $\mathbf{B}$  update by (3), we have

$$\begin{aligned}\mathbf{B}_{t+1} &= \arg \min_{\mathbf{B}: \mathbf{B}^T \mathbf{B} = \mathbf{I}} \|\mathbf{E}_{t+1} \mathbf{B}^T - \mathbf{X}^T \mathbf{W}_{t+1}\|_F^2 \\ &= \arg \min_{\mathbf{B}: \mathbf{B}^T \mathbf{B} = \mathbf{I}} J_B(\mathbf{W}_{t+1}, \mathbf{B}, \mathbf{E}_{t+1}, \mathbf{F}_{t+1}).\end{aligned}\quad (12)$$

This implies that

$$J(\mathbf{W}_{t+1}, \mathbf{B}_{t+1}, \mathbf{E}_{t+1}, \mathbf{F}_{t+1}) \leq J(\mathbf{W}_{t+1}, \mathbf{B}_t, \mathbf{E}_{t+1}, \mathbf{F}_{t+1}). \quad (13)$$

From (8), (11), and (13), each update rule monotonically decreases the objective function at every iteration. We also notice that, since  $J(\mathbf{W}_t, \mathbf{B}_t, \mathbf{E}_t, \mathbf{F}_t)$  is convex in each variable, the algorithm with the update rules must converge.  $\square$

## References

- [1] F. Nie, H. Huang, X. Cai, and C. H. Ding. Efficient and robust feature selection via joint  $l_{2,1}$ -norms minimization. In *NIPS*, pages 1813–1821, 2010. 2
